# Supplementary material for: The Troublesome Ticks Research Protocol: Developing a Comprehensive, Multidiscipline Research Plan for Investigating Human Tick-Associated Disease in Australia
Source: MDPI journal article supplement (doi:10.3390/pathogens11111290), 2022-11-03

# GP1- TICK-BITTEN PATIENTS (Tick Collection and Sampling Kit)

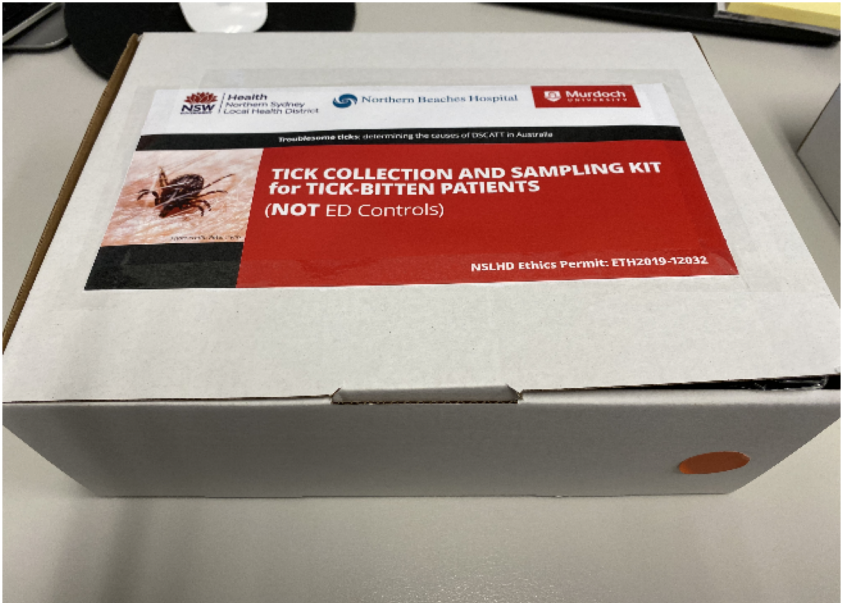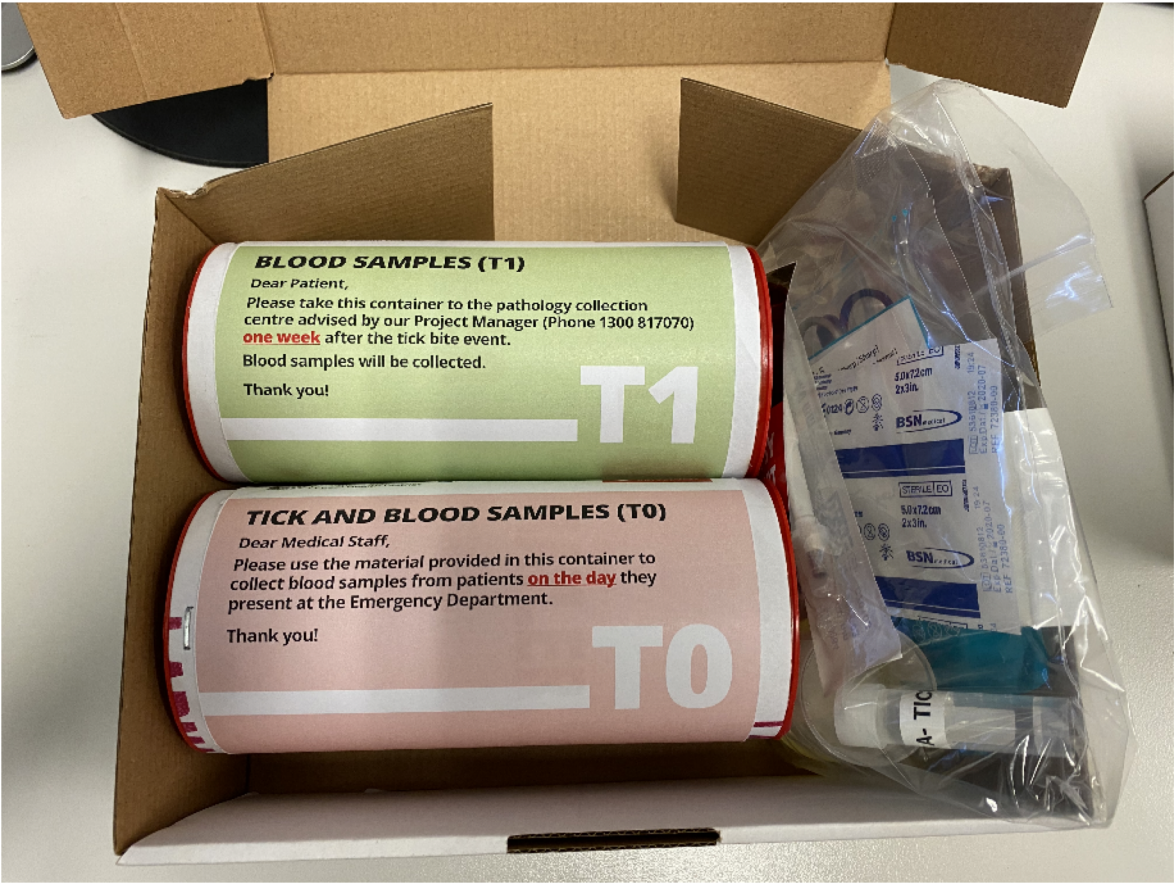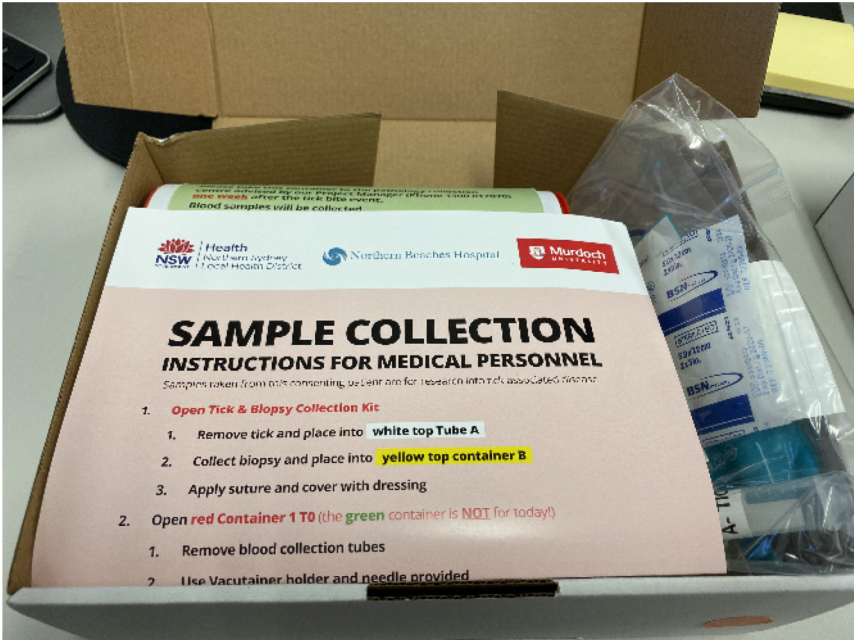



GP1- TICK-BITTEN PATIENTS (Tick and Biopsy Collection Kit)

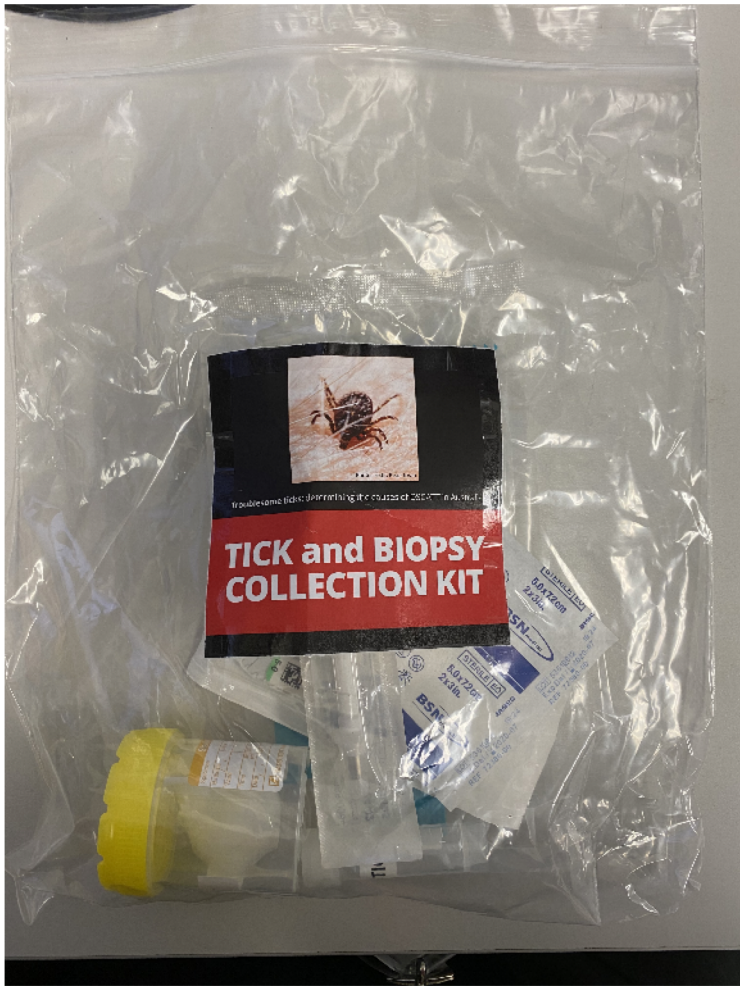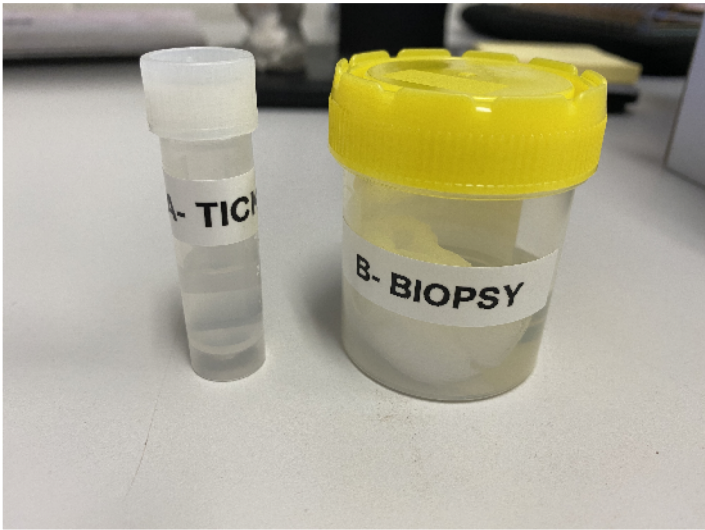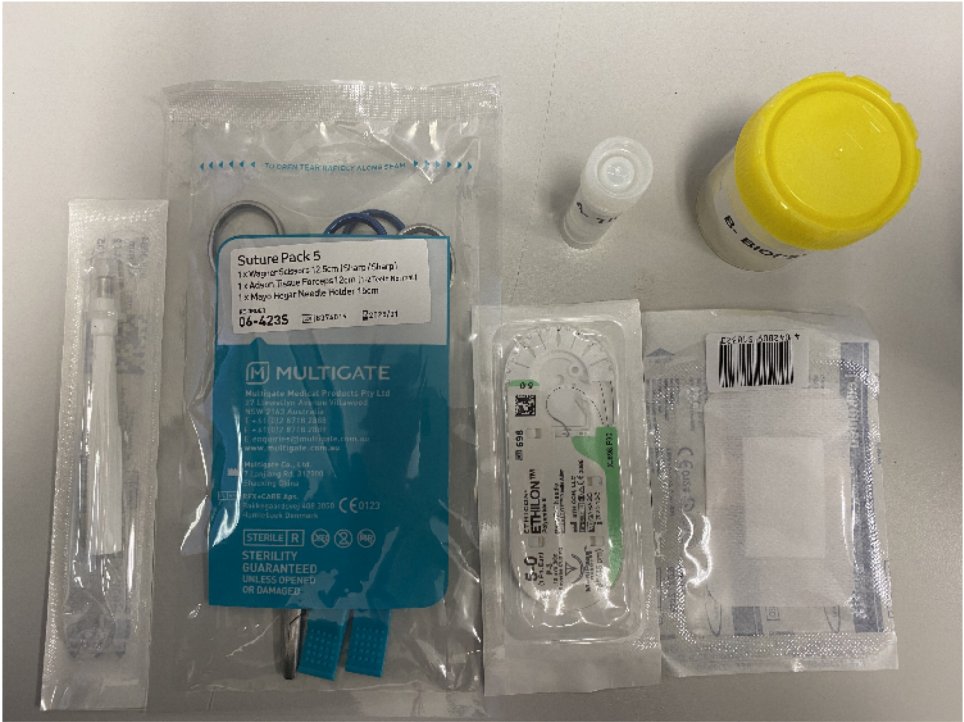



GP1- TICK-BITTEN PATIENTS (Blood Sampling Kit – T<sub>0</sub>)

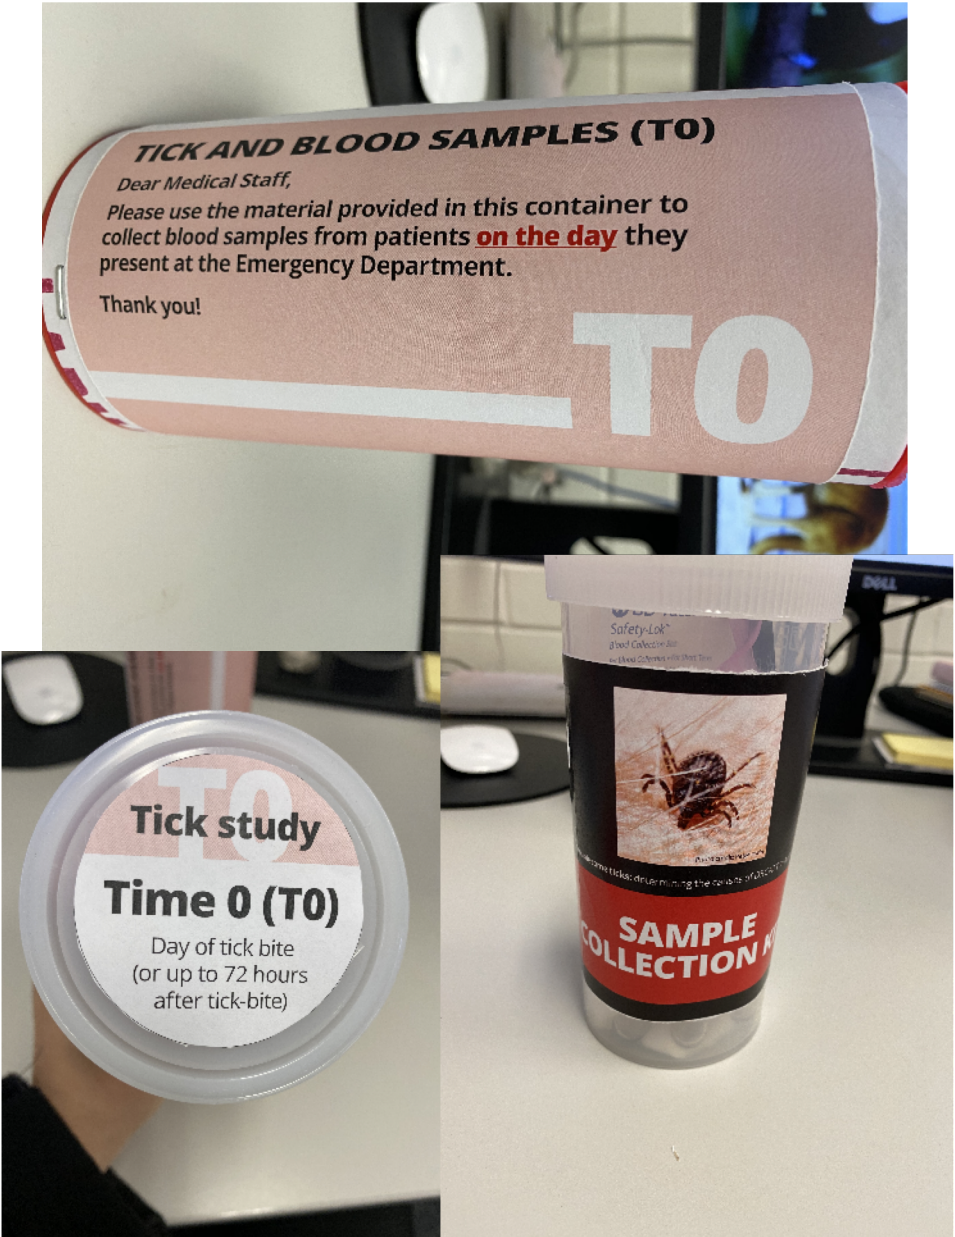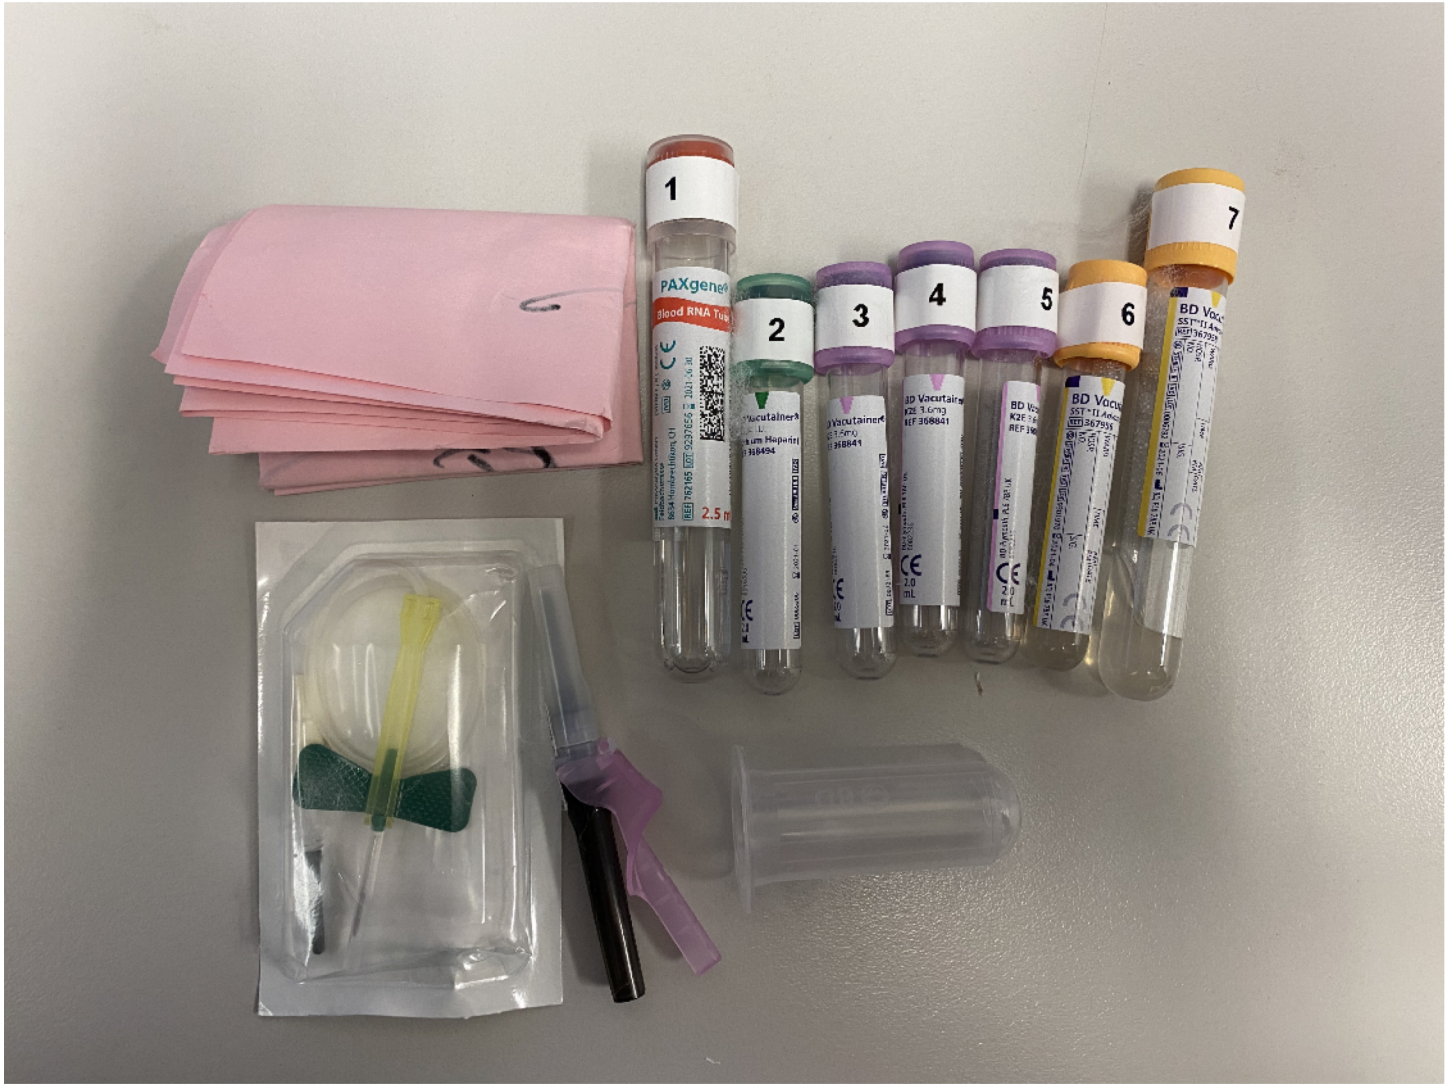



GP1- TICK-BITTEN PATIENTS (Blood Sampling Kit – T<sub>1</sub>)

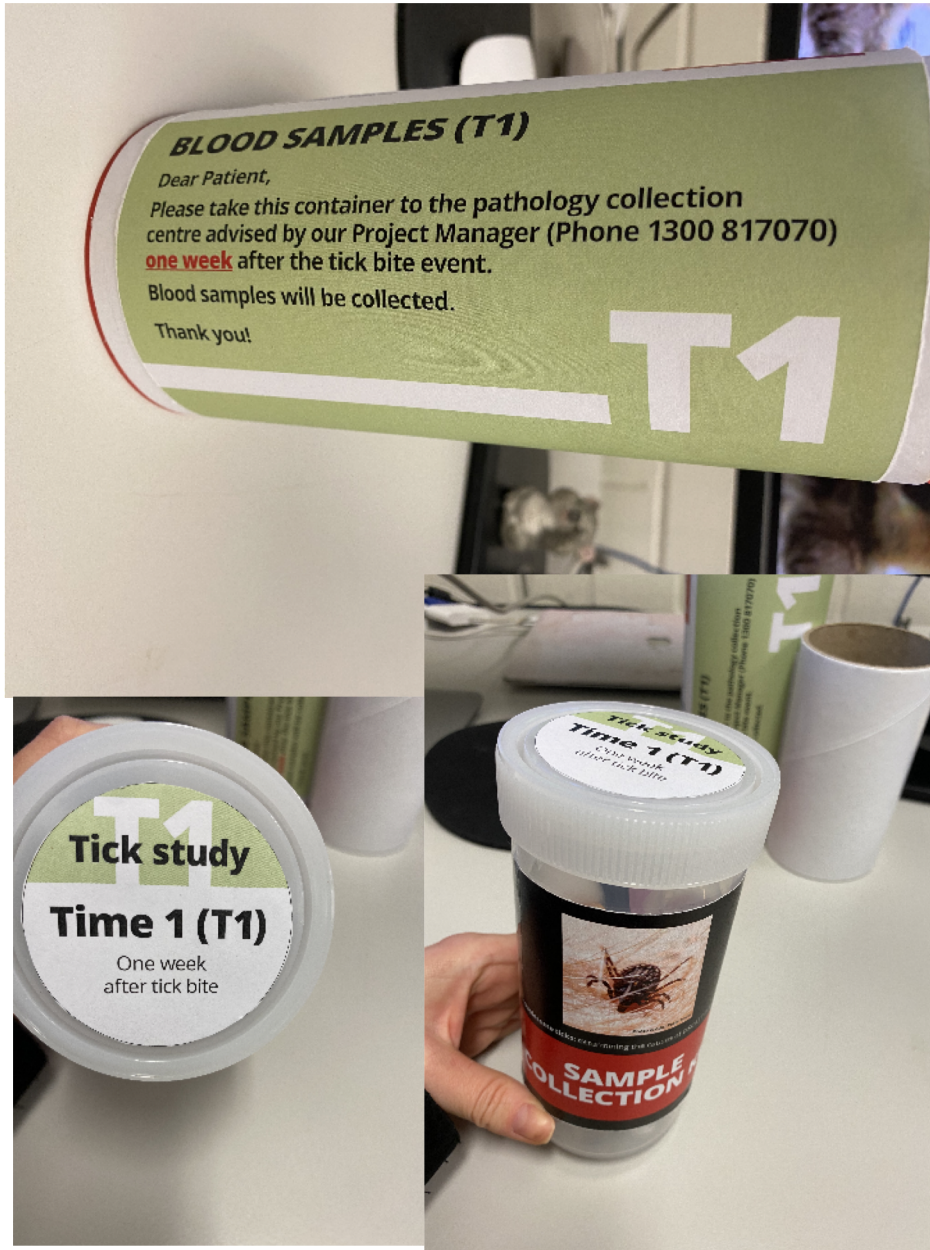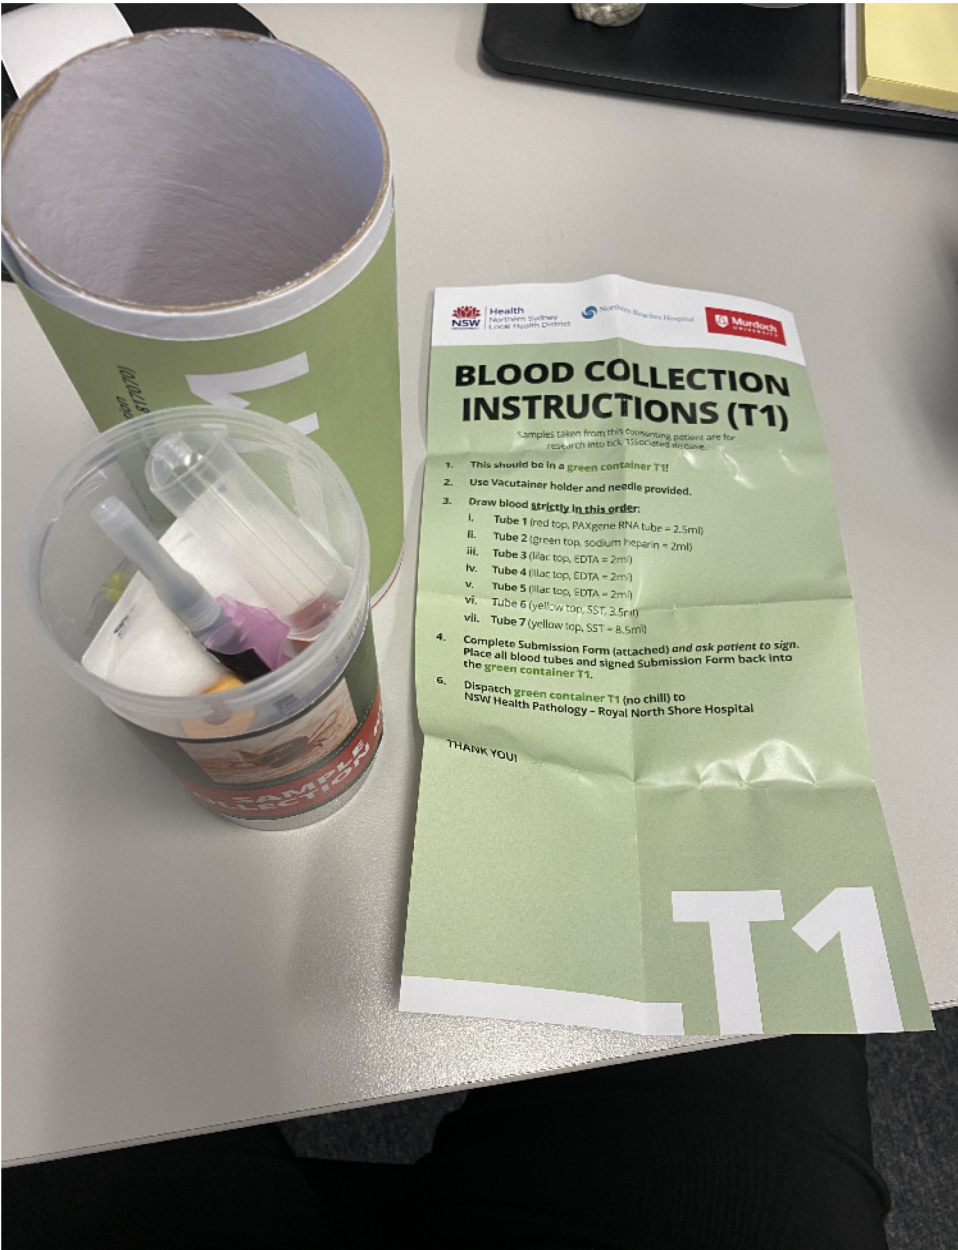



## GP2- ED CONTROLS (Blood Sampling Kit)

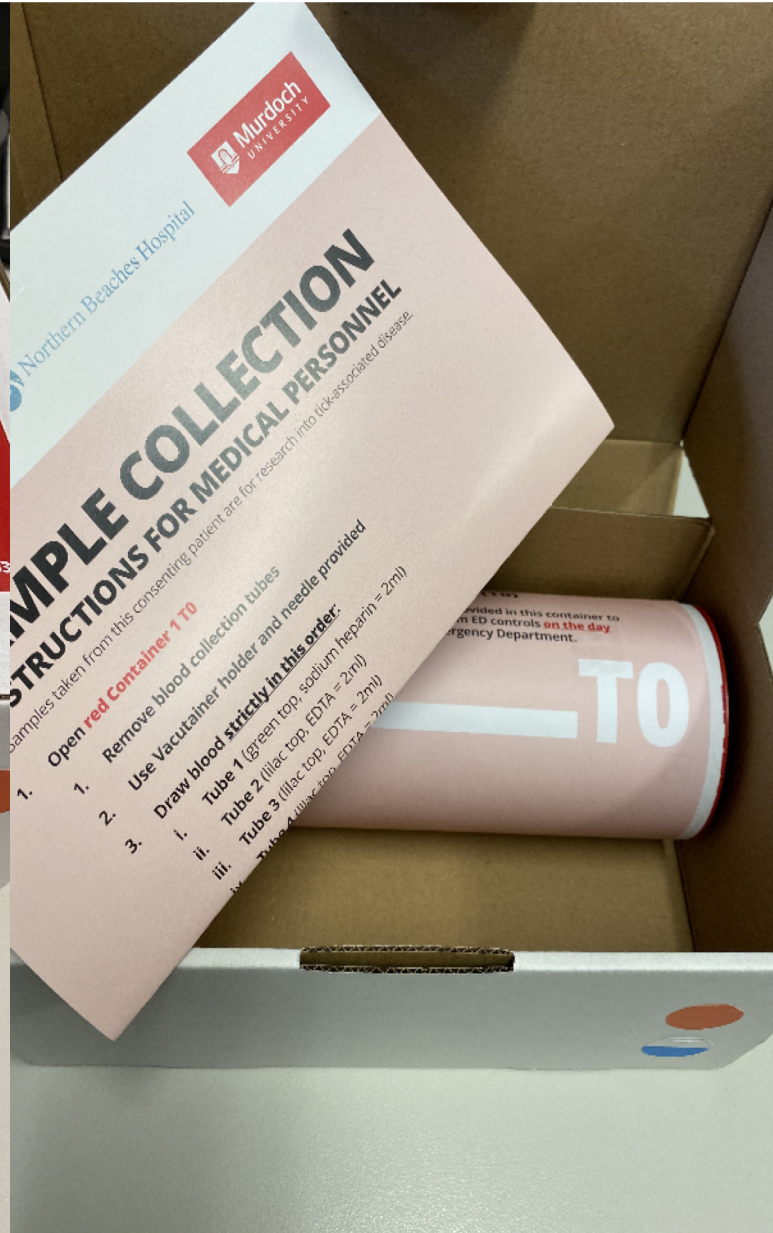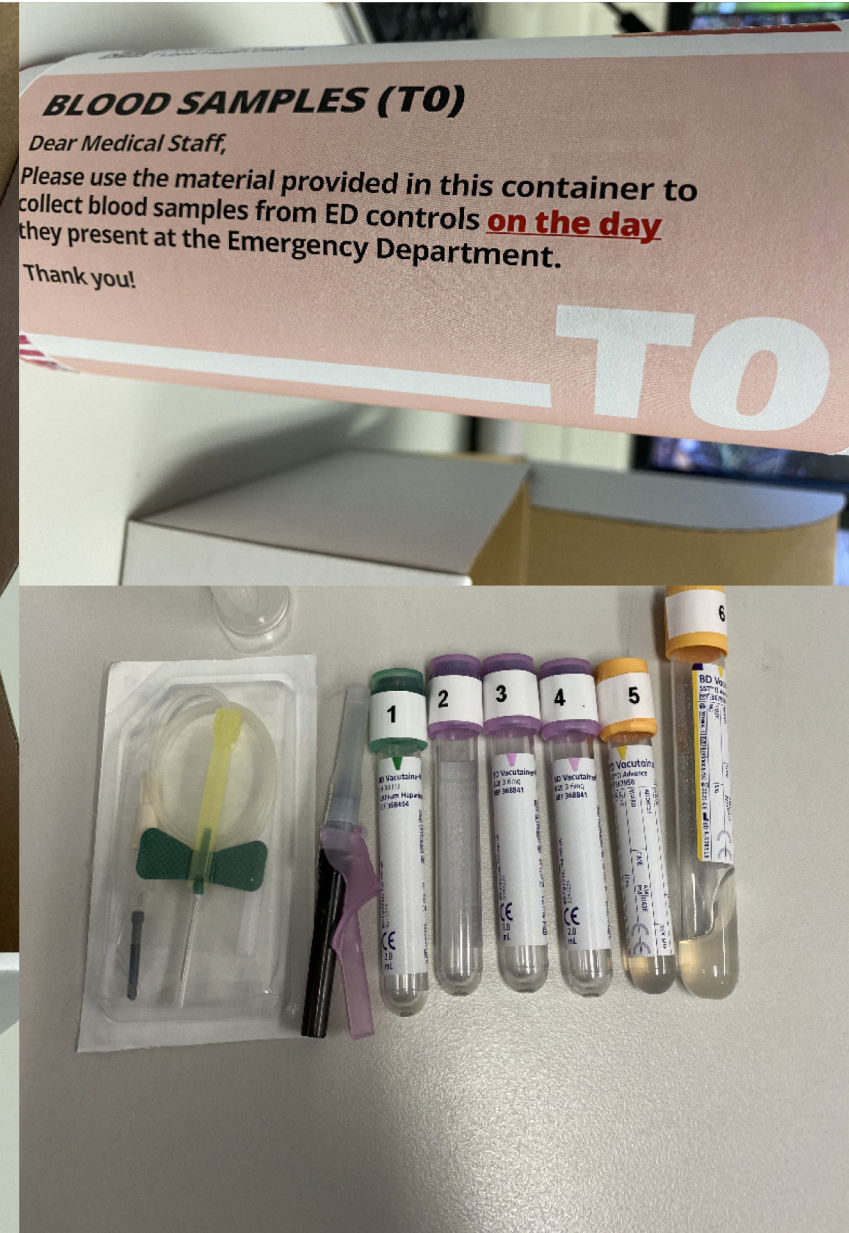

Supplement: s1 [file s1]
