# Supplementary material for: The Troublesome Ticks Research Protocol: Developing a Comprehensive, Multidiscipline Research Plan for Investigating Human Tick-Associated Disease in Australia
Source: MDPI journal article supplement (doi:10.3390/pathogens11111290), 2022-11-03
Supplement: s1 [file s1]

**Biospecimen processing form**

|                                                                     |                                               |                                                                                                                                                                                                           |                       |
|---------------------------------------------------------------------|-----------------------------------------------|-----------------------------------------------------------------------------------------------------------------------------------------------------------------------------------------------------------|-----------------------|
| DATE OF ARRIVAL IN THE LAB (DD/MON/YYYY)                            |                                               | _ _ _ _ - _ _ _ _ - _ _ _ _ _ _                                                                                                                                                                           |                       |
| PARTICIPANT ID                                                      |                                               |                                                                                                                                                                                                           |                       |
| VISIT                                                               |                                               | _ _ _ T0    _ _ _ T1    _ _ _ T2    _ _ _ T3                                                                                                                                                              |                       |
| SPECIMENS RECEIVED<br>(Specify number of each biospecimen received) |                                               | _ _ _ Tick    _ _ _ Biopsy    _ _ _ IPAXgene<br>_ _ _ Heparin    _ _ _ EDTA    _ _ _ SST                                                                                                                  |                       |
| Tube lot number                                                     |                                               | Lithium heparin: _____<br>PAXgene: _____                                                                                                                                                                  |                       |
| Coloration of sample:<br>Y = Yellow; C = Cloudy; P = Pink; R = Red  |                                               | Plasma-Hep    _ _ _ Y    _ _ _ C    _ _ _ P    _ _ _ R<br>Plasma-EDTA    _ _ _ Y    _ _ _ C    _ _ _ P    _ _ _ R<br>Serum    _ _ _ Y    _ _ _ C    _ _ _ P    _ _ _ R                                    |                       |
| Time of spin                                                        |                                               | Plasma-Hep                    _ _ _ _ : _ _ _ _ hrs<br>Plasma-EDTA (1st)    _ _ _ _ : _ _ _ _ hrs<br>Plasma-EDTA (2nd)    _ _ _ _ : _ _ _ _ hrs<br>Serum                            _ _ _ _ : _ _ _ _ hrs |                       |
| Volume of PLAS1                                                     | Volume of PLAS2                               | Volume of PLAS3                                                                                                                                                                                           | Volume of PLAS (EDTA) |
| _ _ _ _ _ _ ul                                                      | _ _ _ _ _ _ ul                                | _ _ _ _ _ _ ul                                                                                                                                                                                            | _ _ _ _ _ _ ul        |
| Time of freeze                                                      |                                               | PLAS 1-4    _ _ _ _ : _ _ _ _ hrs<br>PAXgene    _ _ _ _ : _ _ _ _ hrs                                                                                                                                     |                       |
| RESEARCH STAFF INITIALS                                             | Sample receipt at<br>_ _ _ MU    _ _ _ TKI    | _ _ _ _ _ _                                                                                                                                                                                               |                       |
|                                                                     | Sample processing at<br>_ _ _ MU    _ _ _ TKI | _ _ _ _ _ _                                                                                                                                                                                               |                       |
| COMMENTS OR DEVIATIONS TO PROTOCOL                                  |                                               |                                                                                                                                                                                                           |                       |

**PLEASE RECORD DATA ON REDCap, then ARCHIVE THIS FORM**
