# Supplementary material for: The Troublesome Ticks Research Protocol: Developing a Comprehensive, Multidiscipline Research Plan for Investigating Human Tick-Associated Disease in Australia
Source: MDPI journal article supplement (doi:10.3390/pathogens11111290), 2022-11-03
Supplement: s1 [file s1]

**PLEASE COMPLETE THIS FORM BEFORE SENDING OR UPON RECEIVAL OF BIOSPECIMENS**

|                                                                           |                 |                                                                                                                                                                                                                                                                                                                                                                                                                                                        |
|---------------------------------------------------------------------------|-----------------|--------------------------------------------------------------------------------------------------------------------------------------------------------------------------------------------------------------------------------------------------------------------------------------------------------------------------------------------------------------------------------------------------------------------------------------------------------|
| PARTICIPANT ID                                                            |                 |                                                                                                                                                                                                                                                                                                                                                                                                                                                        |
| VISIT (if known)                                                          |                 | <input type="checkbox"/> T0 <input type="checkbox"/> T1 <input type="checkbox"/> T2 <input type="checkbox"/> T3                                                                                                                                                                                                                                                                                                                                        |
| Date of sample collection                                                 |                 | ____/____/____                                                                                                                                                                                                                                                                                                                                                                                                                                         |
| ORIGIN                                                                    |                 | <input type="checkbox"/> MU <input type="checkbox"/> ARRL <input type="checkbox"/> NSWHP<br><input type="checkbox"/> UQ <input type="checkbox"/> TKI <input type="checkbox"/> CSIRO                                                                                                                                                                                                                                                                    |
| DESTINATION                                                               |                 | <input type="checkbox"/> MU <input type="checkbox"/> ARRL <input type="checkbox"/> NSWHP<br><input type="checkbox"/> UQ <input type="checkbox"/> TKI <input type="checkbox"/> CSIRO                                                                                                                                                                                                                                                                    |
| SPECIMENS BEING DISPATCHED<br>(Specify number/volume of each biospecimen) |                 | <input type="checkbox"/> Tick <input type="checkbox"/> Biopsy <input type="checkbox"/> PAXgene<br><input type="checkbox"/> Heparin <input type="checkbox"/> EDTA <input type="checkbox"/> SST<br>Plasma aliquots: Number <input type="checkbox"/> Volume each <input type="checkbox"/><br>Serum aliquots: Number <input type="checkbox"/> Volume each <input type="checkbox"/><br>Number <input type="checkbox"/> Volume each <input type="checkbox"/> |
| ATTACHED COPY OF COMPLETED<br>"BIOSPECIMEN PROCESSING FORM"?              |                 | <input type="checkbox"/> YES <input type="checkbox"/> NO <input type="checkbox"/> NA                                                                                                                                                                                                                                                                                                                                                                   |
| RESEARCH STAFF<br>NAME AND<br>SIGNATURE                                   | Sample dispatch | Date:   /   /                                                                                                                                                                                                                                                                                                                                                                                                                                          |
|                                                                           | Sample receipt  | Date:   /   /                                                                                                                                                                                                                                                                                                                                                                                                                                          |
| COMMENTS                                                                  |                 |                                                                                                                                                                                                                                                                                                                                                                                                                                                        |

**Sender:** Please send a signed copy of this form to destination lab along with complete "Biospecimen processing form" and samples. Please also archive a copy in your laboratory.

**Recipient:** Please sign this form and archive a copy in your laboratory.

**MU and ARRL Researchers ONLY: Record SAMPLE TRANSFER details on REDCap**
