# Supplementary material for: The Troublesome Ticks Research Protocol: Developing a Comprehensive, Multidiscipline Research Plan for Investigating Human Tick-Associated Disease in Australia
Source: MDPI journal article supplement (doi:10.3390/pathogens11111290), 2022-11-03
Supplement: s1 [file s1]

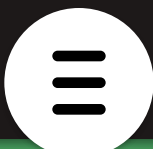

MENU

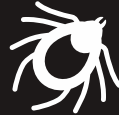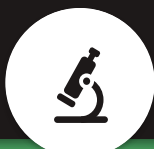

INFO

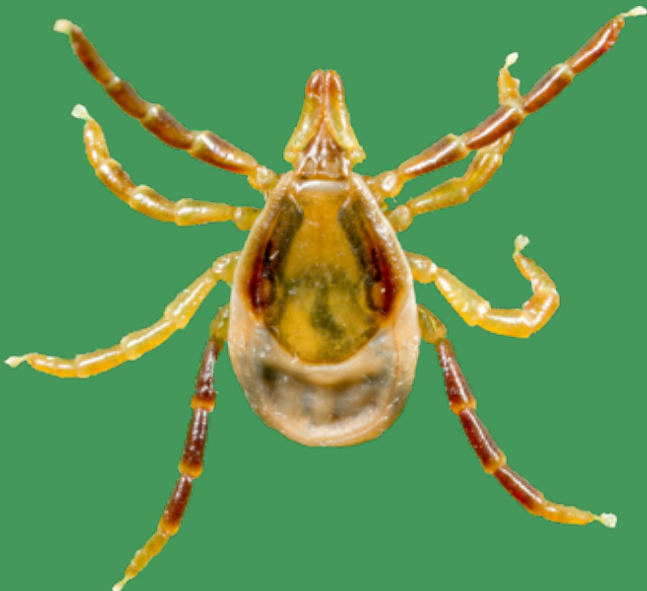

# #PARTICIPANT PORTAL

## Welcome!

Thanks for volunteering. Your participation in this study will help us identify the illnesses that affect thousands of Australians every year. It could be YOUR data that makes all the difference!

NB: Please don't press the 'back' button while using this Participant Portal

 SIGN UP / SIGN IN

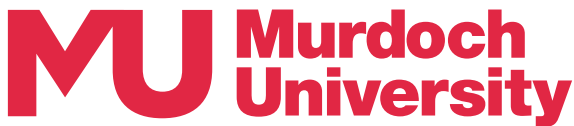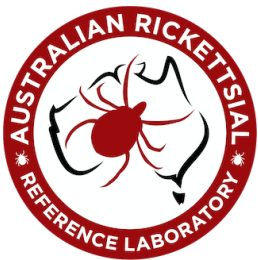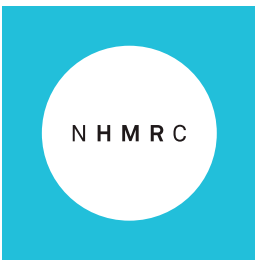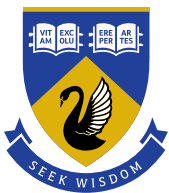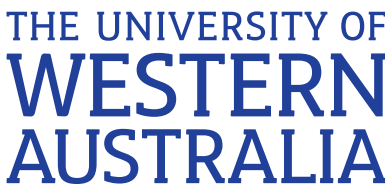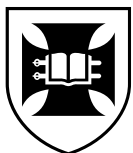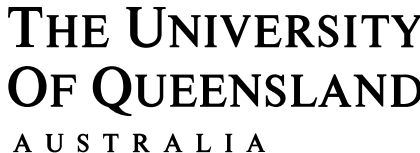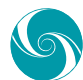

Northern Beaches Hospital

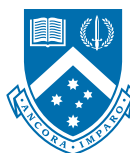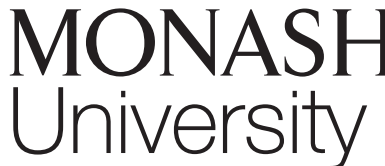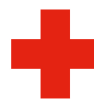

Australian Red Cross  
**Lifeblood**

### MENU

- Home
- About
- Frequently Asked Questions
- Avoiding Tick Bites
- For Patients
- For Medical Personnel
- For Pathology Centres
- In the Media
- Our Team
- Contact Us

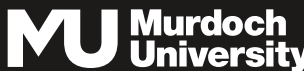

### CONTACT US

Troublesome Ticks Research

1300 817070

DSCATT@rickettsialab.org.au
